# Supplementary material for: Evaluation and Projection of Precipitation in CMIP6 Models over the Qilian Mountains, China
Source: MDPI journal article supplement (doi:10.3390/rs15174350), 2023-09-04
Supplement: s1 [file s1]

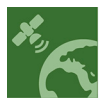

## Supporting information for “Evaluation and projection of precipitation in CMIP6 models over the Qilian Mountains, China”

**Table S1.** Models that fail the significance test.

|                  | Dunhuang | Guazhou | Yumenzhen | Jiuquan | Lenghu | Yongchang | Wuwei | Dachaidan | Delingha |
|------------------|----------|---------|-----------|---------|--------|-----------|-------|-----------|----------|
| ACCESS-ESM1-5    |          |         |           |         |        | ×         | ×     |           |          |
| ACCESS-CM2       |          | ×       | ×         |         | ×      | ×         | ×     |           |          |
| AWI-CM-1-1-MR    | ×        | ×       |           |         | ×      | ×         | ×     |           |          |
| BCC-CSM2-MR      | ×        | ×       |           |         |        |           | ×     |           |          |
| CESM2-WACCM      |          |         |           |         |        |           | ×     |           |          |
| CESM2            |          |         |           |         |        |           | ×     |           |          |
| CMCC-CM2-SR5     |          |         |           |         |        |           |       |           |          |
| CMCC-ESM2        |          |         |           |         |        |           | ×     |           |          |
| CNRM-CM6-1-HR    |          |         |           |         |        |           | ×     |           |          |
| CNRM-ESM2-1      | ×        |         | ×         |         |        |           | ×     |           |          |
| EC-Earth3-Veg-LR | ×        | ×       |           |         |        |           | ×     |           |          |
| EC-Earth3-Veg    | ×        | ×       |           |         |        |           | ×     |           |          |
| EC-Earth3        | ×        | ×       |           |         |        |           | ×     |           |          |
| FGOALS-f3-L      | ×        | ×       |           |         |        |           | ×     |           |          |
| GFDL-ESM4        |          |         |           |         |        | ×         | ×     |           |          |
| KACE-1-0-G       | ×        | ×       | ×         | ×       | ×      |           | ×     | ×         | ×        |
| MIROC6           |          |         |           |         |        | ×         | ×     |           |          |
| MPI-ESM1-2-HR    | ×        | ×       |           |         | ×      |           | ×     |           |          |
| MRI-ESM2-0       | ×        | ×       |           |         | ×      | ×         | ×     |           |          |
| NorESM2-MM       |          |         |           |         |        |           | ×     |           |          |
| TaiESM1          |          |         |           |         |        |           | ×     |           |          |

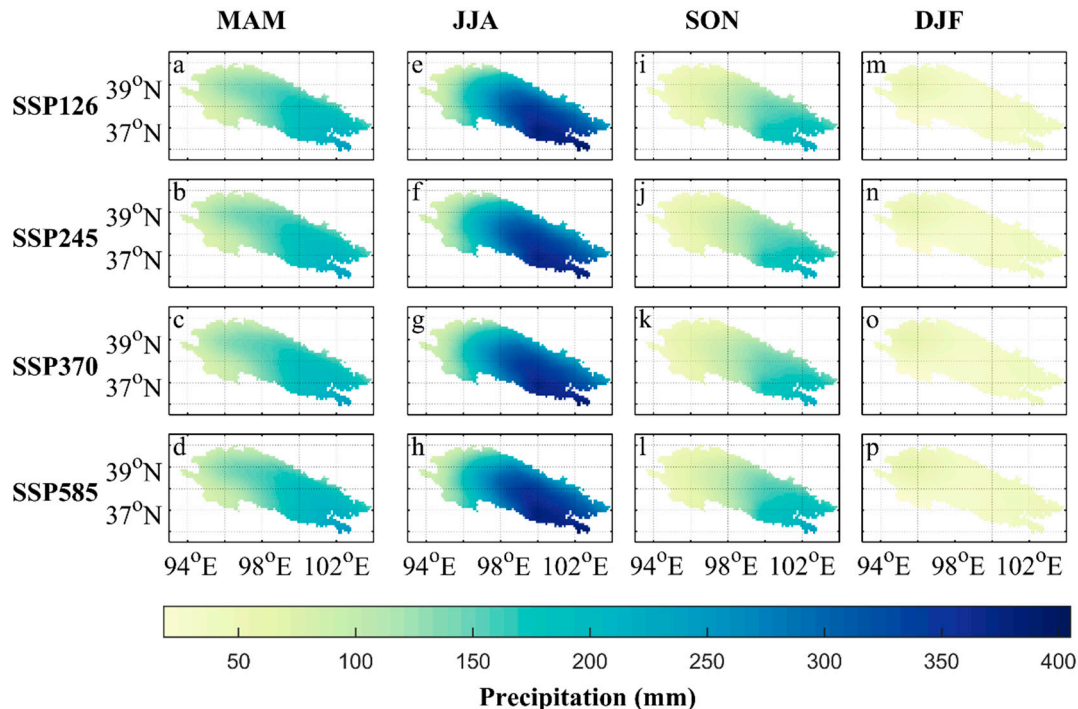**Figure S1.** Spatial distribution of annual seasonal precipitation during the period 2015-2100 from the MME: MAM (a, b, c, d), JJA (e, f, g, h), SON (i, j, k, l), DJF (m, n, o, p).

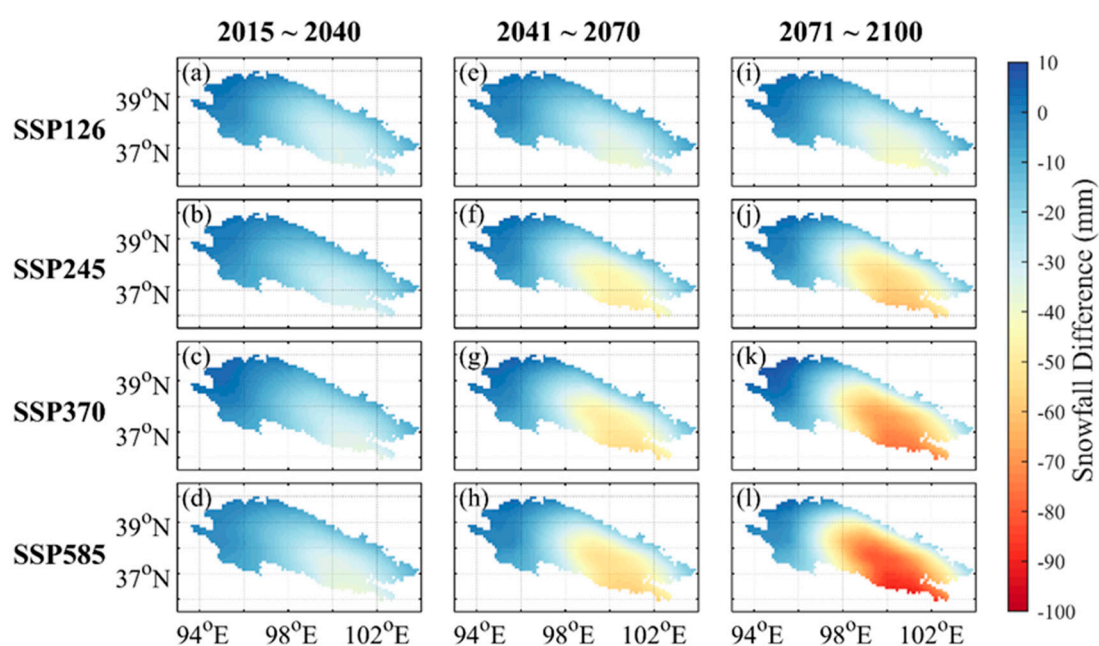

**Figure S2.** Spatial distribution of differences in annual snowfall over the QMs between four different SSPs (2015-2040, 2041-2070, 2071-2100) and historical period (1959-1988) from MME: SSP126(a, b, c), SSP245(d, e, f), SSP370(g, h, i), and SSP585(j, k, l).

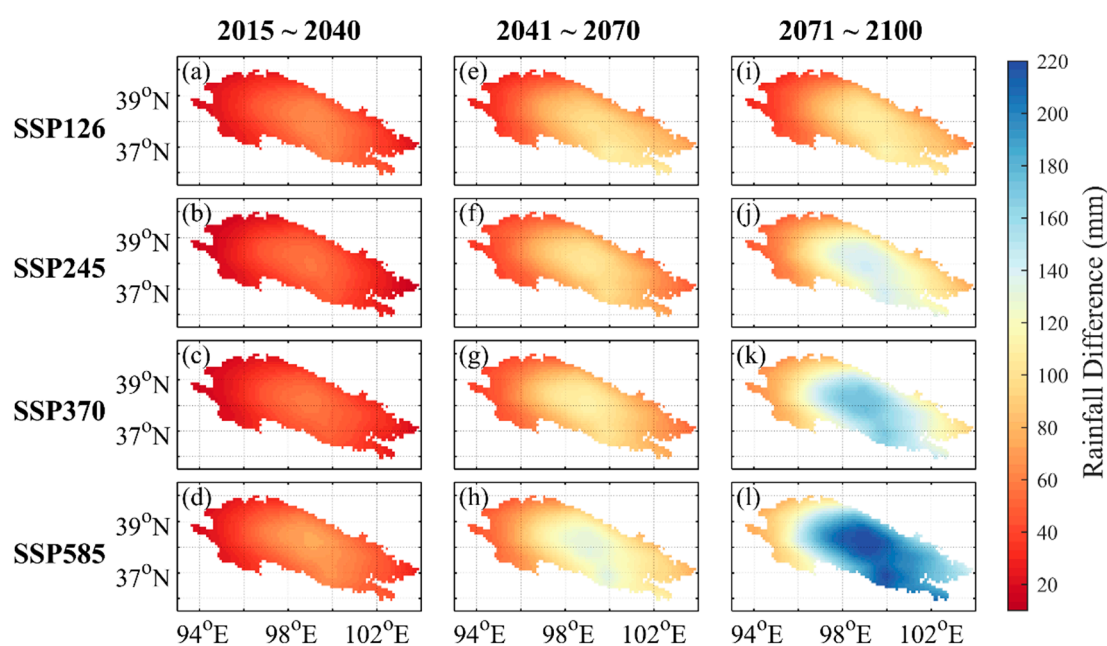

**Figure S3.** Spatial distribution of annual rainfall differences over the QMs between four different SSPs (2015-2040, 2041-2070, 2071-2100) and the historical period (1959-1988) from MME: SSP126 (a, b, c), SSP245 (d, e, f), SSP370 (g, h, i), and SSP585 (j, k, l).

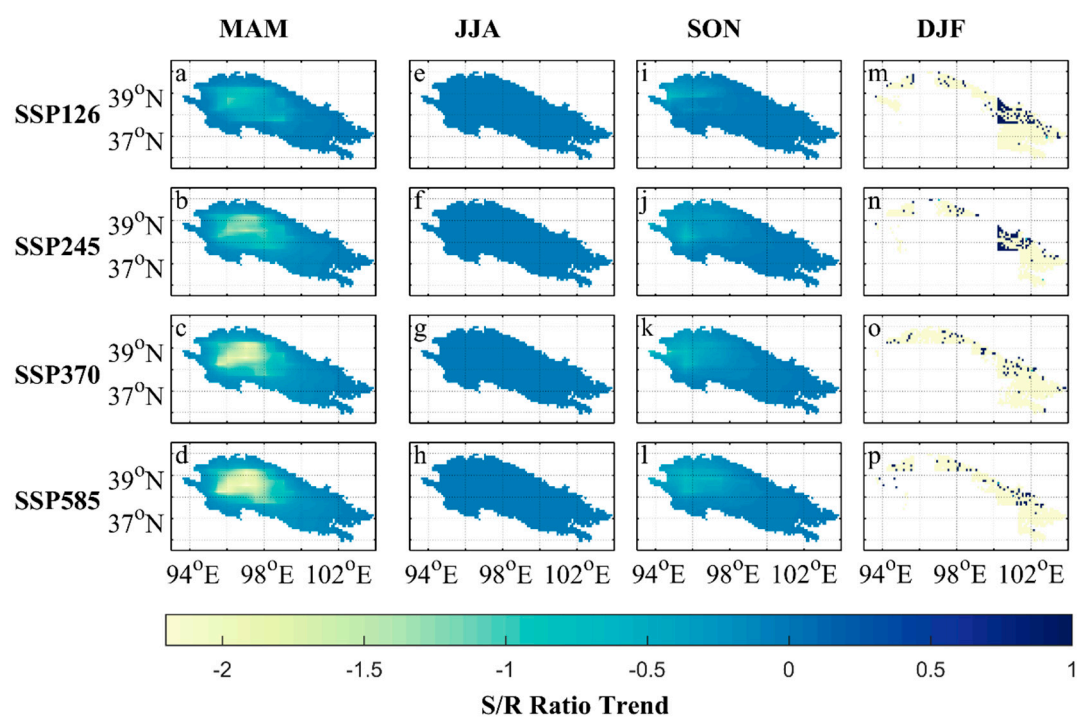

**Figure S4.** Spatial distribution of the annual seasonal S/R ratio trend during the period 2015-2100 from the MME: MAM (a, b, c, d), JJA (e, f, g, h), SON (i, j, k, l), DJF (m, n, o, p).

#### CESM2 evaluation and projection:

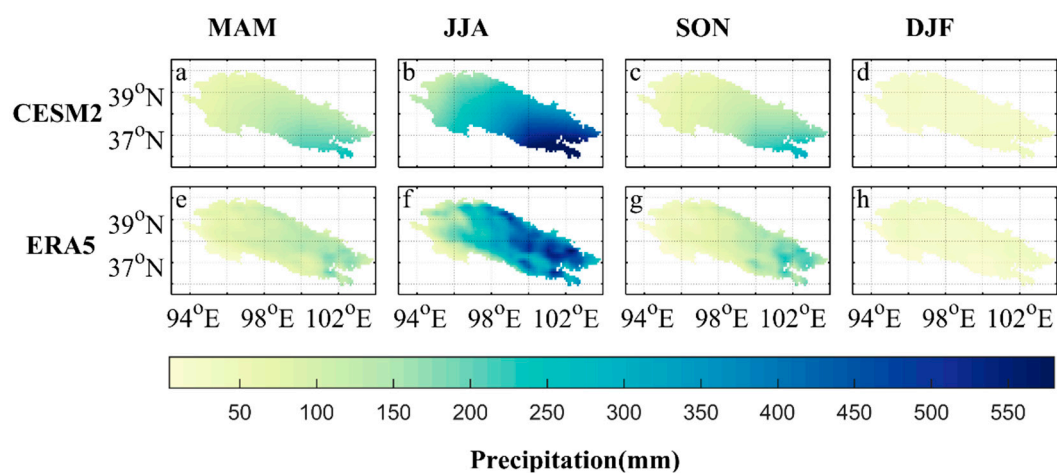

**Figure S5.** Seasonal average precipitation from 1959 to 1988 from CESM2 (a, b, c, d) and ERA5 (e, f, g, h) for spring (MAM), summer (JJA), autumn (SON) and winter (DJF).

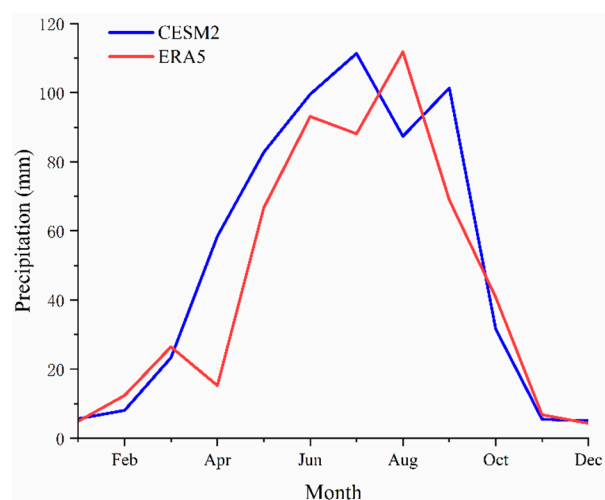

**Figure S6.** Annual cycles of mean monthly precipitation from CESM2 (blue line) and ERA5 (red line) during the period 1959 - 1988.

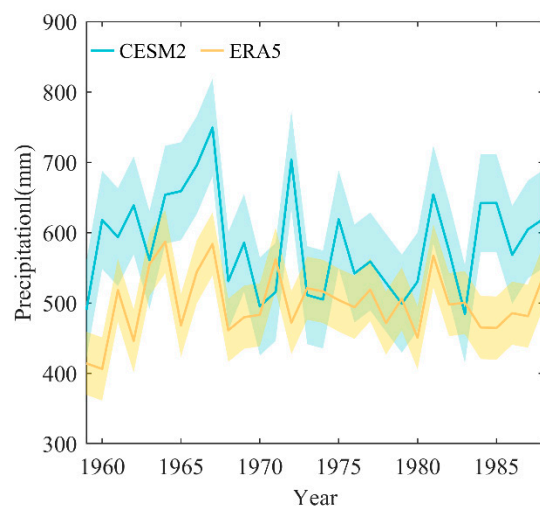

**Figure S7.** Time series of annual total precipitation from CESM2 (blue line) and ERA5 (yellow line) during the period 1959 - 1988 (the shaded part represents one standard deviation).
